# Supplementary material for: The phosphotransferase VanU represses expression of four qrr genes antagonizing VanO-mediated quorum-sensing regulation in Vibrio anguillarum
Source: PubMed Central journal article supplement (PMC3352281; doi:10.1099/mic.0.051011-0), 2011-12
Supplement: supp_157.12.3324_Supplementary_Figs_051011.pdf [file supp_157.12.3324_Supplementary_Figs_051011.pdf]

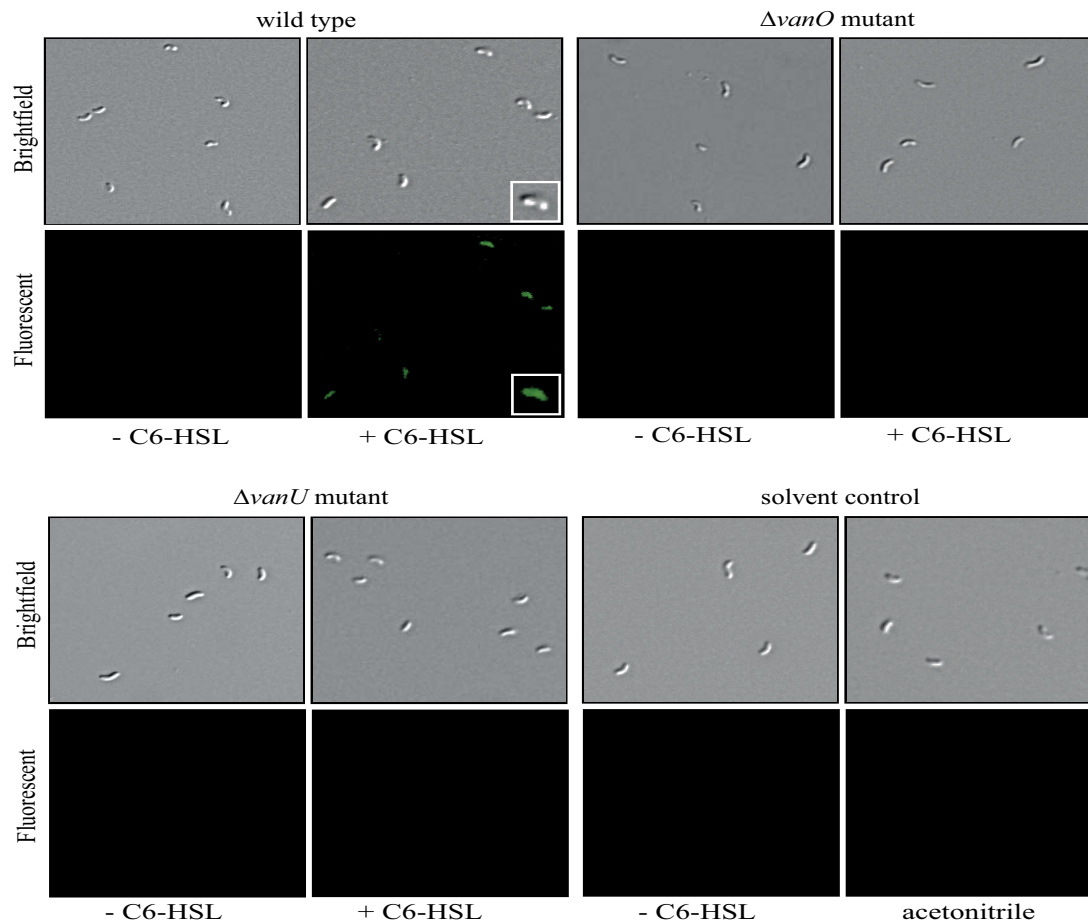

**Fig. S1.** Analyses of the induction of *qrr2* expression by AHL signal molecules in the wild type and the *vanO* and *vanU* mutants.

Supplementary Fig. S1. Analysis of the induction of *qrr2* expression by AHL signal molecules in the wild type and the *vanO* and *vanU* mutants.

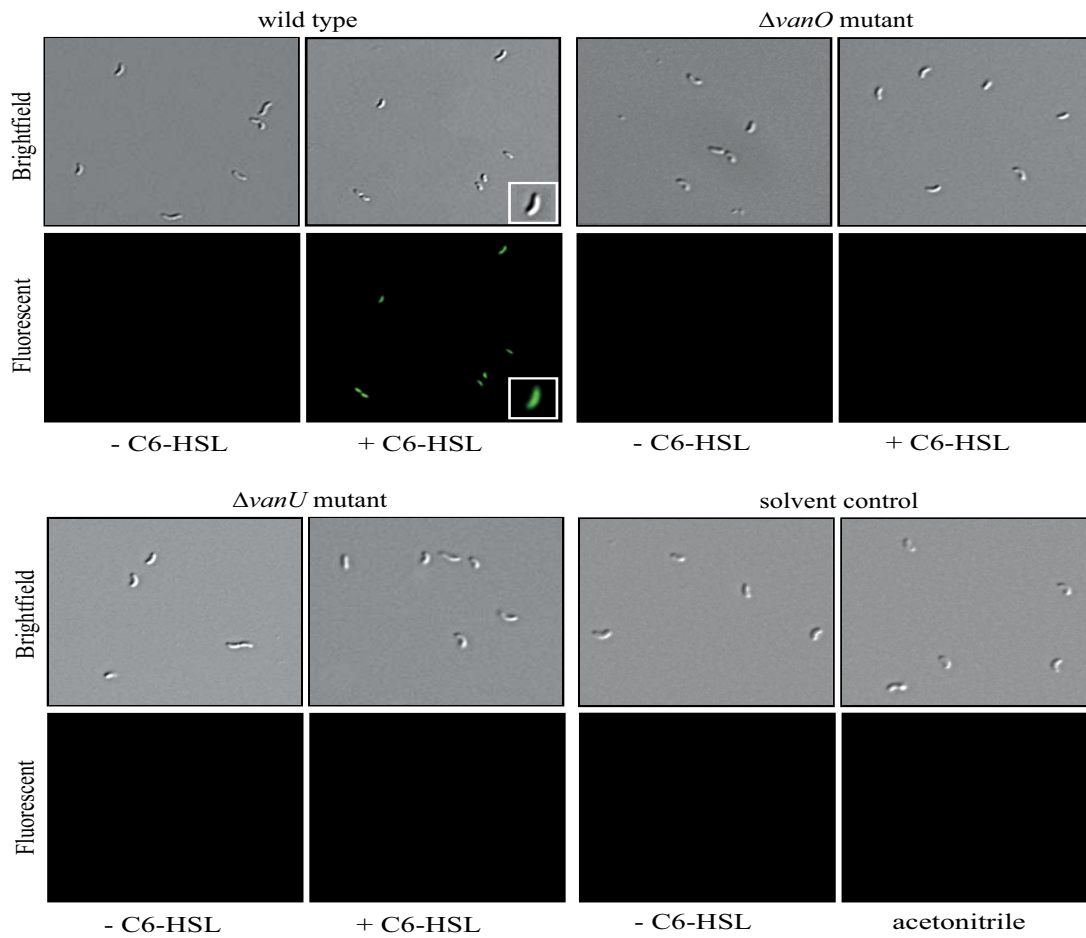

**Fig. S2.** Analyses of the induction of *qrr3* expression by AHL signal molecules in the wild type and the *vanO* and *vanU* mutants.

Supplementary Fig. S2. Analysis of the induction of *qrr3* expression by AHL signal molecules in the wild type and the *vanO* and *vanU* mutants.

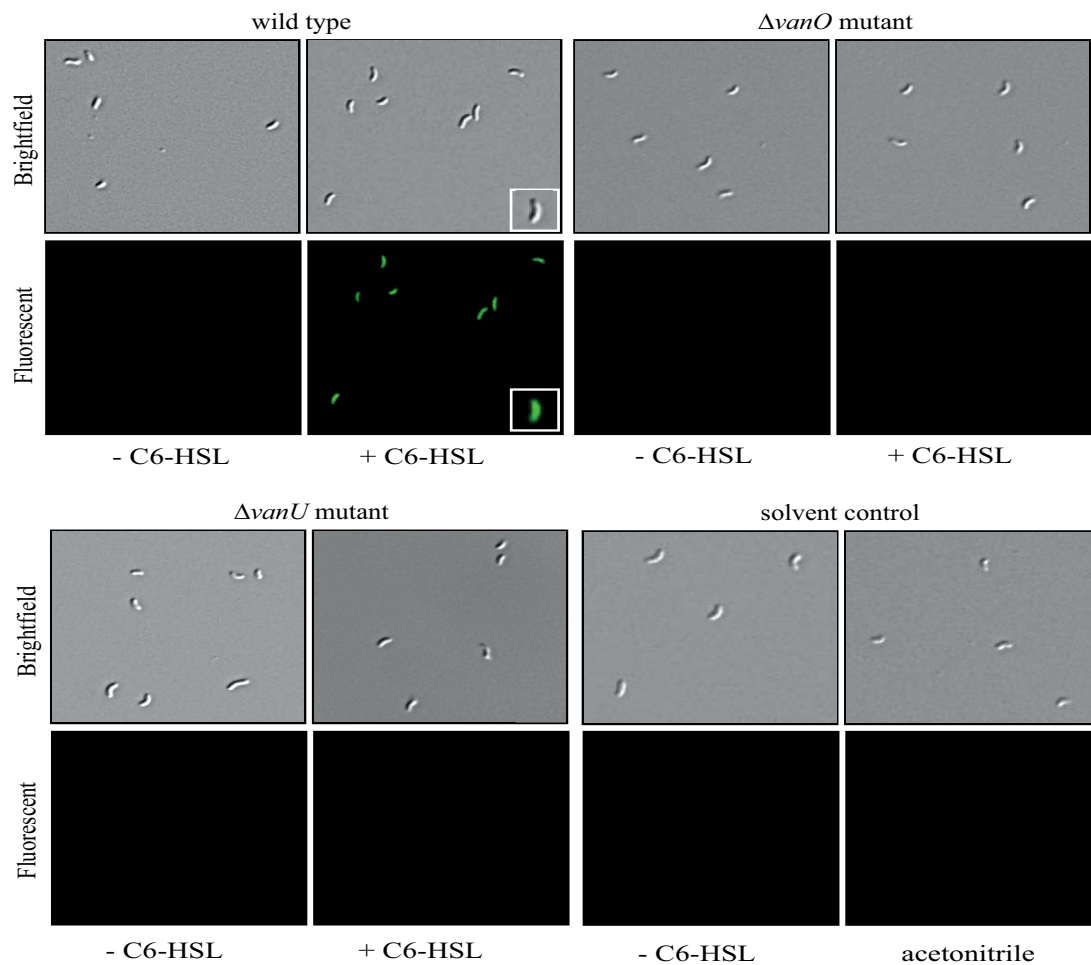

**Fig. S3.** Analyses of the induction of *qrr4* expression by AHL signal molecules in the wild type and the *vanO* and *vanU* mutants.

**Supplementary Fig. S3.** Analyses of the induction of *qrr4* expression by AHL signal molecules in the wild-type and the *vanO* and *vanU* mutants.
