# Supplementary material for: The phosphotransferase VanU represses expression of four qrr genes antagonizing VanO-mediated quorum-sensing regulation in Vibrio anguillarum
Source: PubMed Central journal article supplement (PMC3352281; doi:10.1099/mic.0.051011-0), 2011-12
Supplement: supp_157.12.3324_Supplementary_Table_S1_051011.pdf [file supp_157.12.3324_Supplementary_Table_S1_051011.pdf]

Supplementary Table S1. Primers used in this study

| Primer name (purpose)                   | 5'–3' sequence*                         | Reference gene  |
|-----------------------------------------|-----------------------------------------|-----------------|
| <b>Mutant allele construction</b>       |                                         |                 |
| Qrr1-A                                  | GG <u>ACTAGT</u> TCTAAGGTGGCAGAAAGCTCG  | <i>qrr1</i>     |
| Qrr1-B                                  | TTGCATAAAATTAAGTGTTACAAATAAC            | <i>qrr1</i>     |
| Qrr1-C                                  | TTAATTTTATGCAAAAAGGGCTATTAA             | <i>qrr1</i>     |
| Qrr1-D                                  | CTCGAGCTCGCCGTATCTTCCACCATC             | <i>qrr1</i>     |
| Qrr2-A                                  | GG <u>ACTAGT</u> TACAGCTAAGTATCGGTT     | <i>qrr2</i>     |
| Qrr2-B                                  | TAAGCGCTATAAAACATTTACATAGGCCAA          | <i>qrr2</i>     |
| Qrr2-C                                  | GTTTTATAAGCGCTTAGTTGCTATTGTTTCC         | <i>qrr2</i>     |
| Qrr2-D                                  | CTCGAGCTCTAATAGATATATGGTGCTGAT          | <i>qrr2</i>     |
| Qrr3-A                                  | GG <u>ACTAGT</u> CGATACGGATCATCCTTATGG  | <i>qrr3</i>     |
| Qrr3-B                                  | GCAGACCTTTTTTAGCTATATATAAGCCAA          | <i>qrr3</i>     |
| Qrr3-C                                  | CTAAAAAAGGTCTGCCTTTTTAGCTATGCA          | <i>qrr3</i>     |
| Qrr3-D                                  | CTCGAGCTCAGTGTATTTGCCGGAAGTATATAA       | <i>qrr3</i>     |
| Qrr4-A                                  | GG <u>ACTAGT</u> AGCCAGAATTTGATAATGTG   | <i>qrr4</i>     |
| Qrr4-B                                  | ATTGGCTATTAATAAGTGCTTTAAACTGCCAA        | <i>qrr4</i>     |
| Qrr4-C                                  | CACTTATTAATAGCCAATCATACTTTTTGTGAT       | <i>qrr4</i>     |
| Qrr4-D                                  | CTCGAGCTCGCTCTTATTCCAAGACATA            | <i>qrr4</i>     |
| VanO-H                                  | CTCGAGCTCATCTTGTTATCCACG                | <i>vanO</i>     |
| VanO-J                                  | GG <u>ACTAGT</u> TGCAAAATGCGAACC        | <i>vanO</i>     |
| VanO-D56-2                              | AGCAATATGAGGTCCGGCTCTCGG                | <i>vanO</i>     |
| VanO-D56A-3                             | GACCTCATATTGCTG <u>GCT</u> CTTCGATTACCC | <i>vanO</i>     |
| VanO-D56E-3                             | GACCTCATATTGCTG <u>GAA</u> CTTCGATTACCC | <i>vanO</i>     |
| <b><i>gfp</i> reporter gene fusions</b> |                                         |                 |
| qrr2gfpS                                | GGT <u>GAGCT</u> CTAACAGTACAAATGG       |                 |
| qrr2gfpX                                | TGCTCTAGAAATATAGTTATTGCAG               | <i>qrr2</i>     |
| qrr3gfpS                                | GGT <u>GAGCT</u> CTCCCTTTTAAAAACG       | <i>qrr2</i>     |
| qrr3gfpX                                | TGCTCTAGAAATAGTATTATGCAT                | <i>qrr3</i>     |
| qrr4gfpS                                | GGT <u>GAGCT</u> CCCAGTCATTTATGAG       | <i>qrr3</i>     |
| qrr4gfpX                                | TGCTCTAGACTTACTATATAGCAG                | <i>qrr4</i>     |
| <b>qRT-PCR</b>                          |                                         |                 |
| vanT-left                               | CCACGCAGATATTGCTGAA                     |                 |
| vanT-right                              | CTTTCGCATGCAAATCAAGA                    | <i>vanT</i>     |
| 16SrRNA-left                            | CATGCCGCGTGTATGAAGAA                    | <i>vanT</i>     |
| 16SrRNA-right                           | CGTCAAATGATGCTGCTATTAACAA               | <i>16S rRNA</i> |
| <b>Northern analyses</b>                |                                         | <i>16S rRNA</i> |

Weber, B., Lindell, K., Elqaidi, S., Hjerde, E., Willassen, N.-P. & Milton, D. L. (2011). The phosphotransferase VanU represses expression of four *qrr* genes antagonizing VanO-mediated quorum-sensing regulation in *Vibrio anguillarum*. *Microbiology* **157**, 3324–3339.

|                             |                                       |                 |
|-----------------------------|---------------------------------------|-----------------|
| VanT-1                      | CCACGCAGATATTGCTG                     | <i>vanT</i>     |
| VanT-13                     | ACGTTCAATGGCTTTGAT                    | <i>vanT</i>     |
| 27F                         | AGAGTTTGATCATGGCTCAG                  | <i>16S rRNA</i> |
| 1492R                       | TACGGYTACCTTGTTACGACTT                | <i>16S rRNA</i> |
| Qrr1-RT-FW                  | CTTAGGGGTCACCTAGC                     | <i>qrr1</i>     |
| Qrr1-RT-REV                 | AAAGGTCTATTGGCTGTTATTTGT              | <i>qrr1</i>     |
| Qrr2-1                      | CTATGTAAATTGTGAACA                    | <i>qrr2</i>     |
| Qrr2-3                      | CGACCCCTTCTAAGCCGA                    | <i>qrr2</i>     |
| Qrr3-5                      | TCATTAGACGAGCGAGGA                    | <i>qrr3</i>     |
| Qrr3-6                      | AATGCGATGCATAGCTAA                    | <i>qrr3</i>     |
| Qrr4-                       | CTGCTTATGAGAAATGTGC                   | <i>qrr4</i>     |
| Qrr4-4                      | TGACCCCTTCTAAGCCGAG                   | <i>qrr4</i>     |
| <b>Protein purification</b> |                                       |                 |
| EmpA- <i>Nco</i> I          | GCTA <b>CCATGG</b> CAGAGGCGACGGGT     | <i>empA</i>     |
| EmpA-Acc651                 | GCTA <b>GGTACCT</b> TAATCCAGTCTTAACGT | <i>empA</i>     |

\*Underlined sequences indicate restriction endonuclease sites, bold letters indicate the ATG start codon, and bold, italic letters indicate an amino acid exchange.
